# Supplementary material for: NF-κB-Inducing Kinase Maintains Mitochondrial Efficiency and Systemic Metabolic Homeostasis
Source: bioRxiv or medRxiv preprint supplement (doi:10.1101/2021.08.26.457753), 2022-09-22
Supplement: Supplementary file [file media-1.pdf]

## Supplementary Information

### NF- $\kappa$ B-Inducing Kinase Maintains Mitochondrial Efficiency and Systemic Metabolic Homeostasis

Authors: Kathryn M. Pflug, Dong W. Lee, Justin Keeney, Raquel Sitcheran

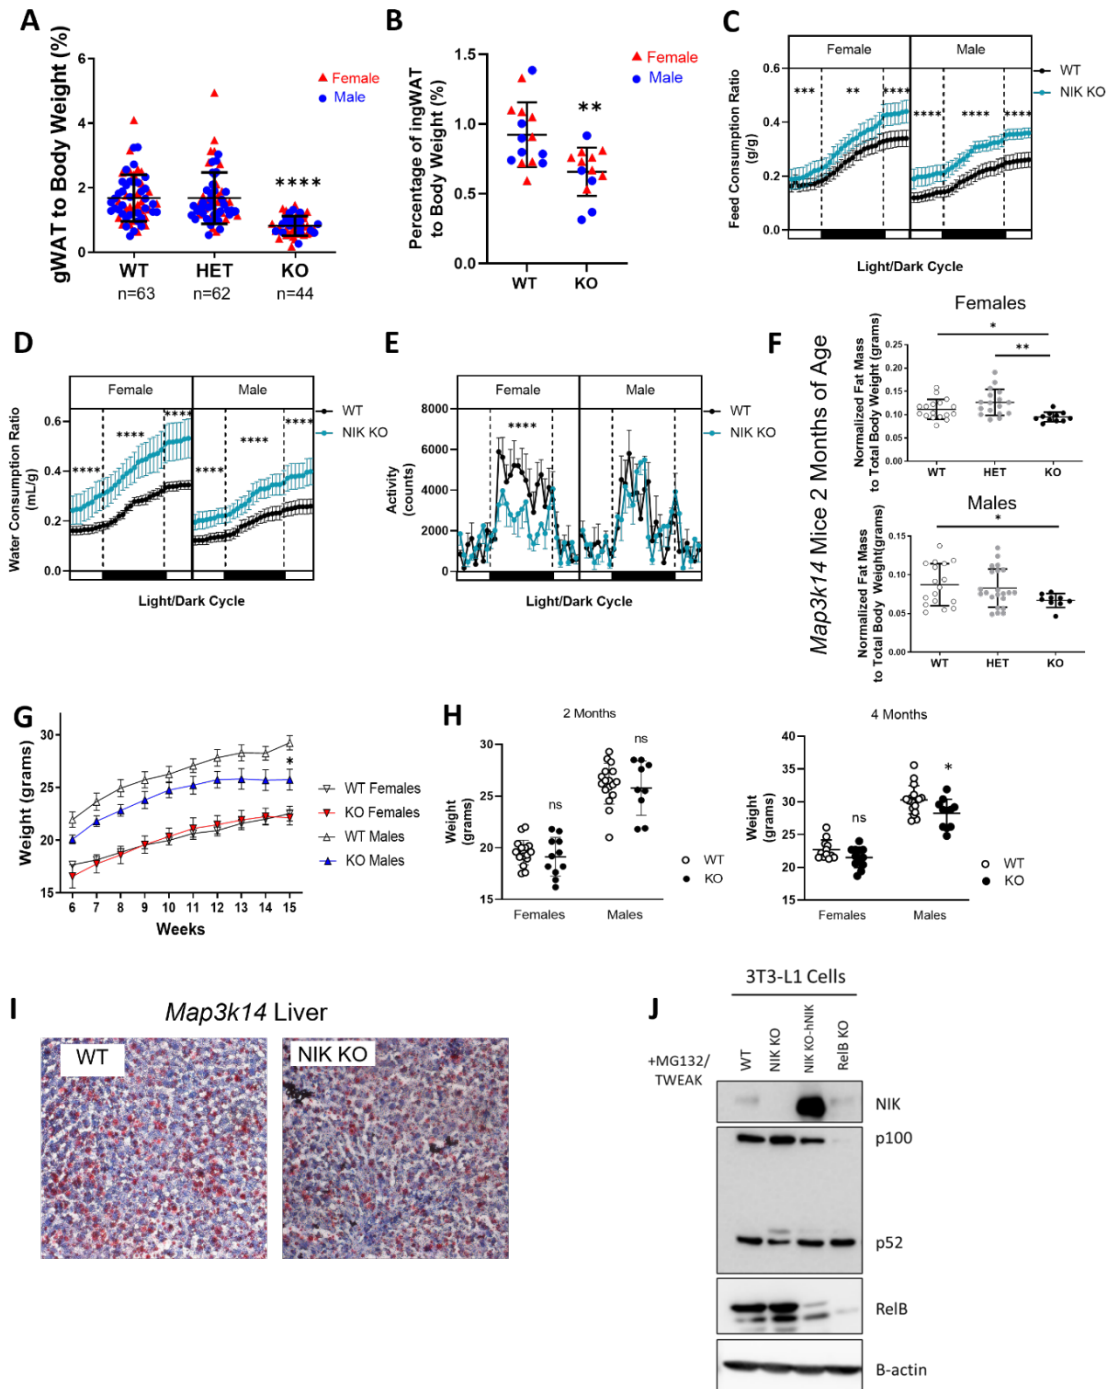

## Supplemental Figure 1.

**(A)** Weights of 4-month-old chow fed WT, HET, and NIK KO male and female gonadal WAT on a chow diet. Data are represented as mean  $\pm$  SD, \*\*\*\*  $p \leq 0.0001$ , Tukey Multiple Comparison Test. **(B)** Analysis of inguinal WAT from chow fed male WT and NIK KO mice. Data represented as mean  $\pm$  SD, \*\*  $p \leq 0.01$ , Unpaired Student t-test. **(C-E)** Metabolic cage data of male and female WT, HET, NIK KO mice at 4 months of age for **(C)** food consumption **(D)**, water consumption, and **(E)** activity. Data are represented as mean  $\pm$  SEM, \* $p \leq 0.05$ , \*\*  $p \leq 0.01$ , \*\*\*\*  $p \leq 0.0001$ , Unpaired Student t-test. **(F)** Echo MRI data of fat and lean mass ratios of male and female *Map3k14* mice at 2 months of age. Data represented as mean  $\pm$  SEM, \*  $p \leq 0.05$ , \*\*  $p \leq 0.01$ , \*\*\*  $p \leq 0.001$ , Unpaired Student t-test. **(G)** Average weights of WT and NIK KO mice between males and females from 6-15 weeks (Female *Map3k14* mice; WT n= 9 and KO n=7, Male *Map3k14* mice; WT n=6 and KO n=5). Data represented as mean  $\pm$  SEM, Sidak's Multiple Comparisons Test. **(H)** Weights from chow-fed, male and female WT and NIK KO mice at 2 months and 4 months of age. Data are represented as mean  $\pm$  SD, 2-month-old Males; WT= 17, KO=9, Females; WT= 17, KO=11, 4-month-old Males; WT=18, KO=11, Females; WT= 12, KO=12, Unpaired Student t-test. **(I)** Oil Red O and hematoxylin staining of liver sections from chow fed WT and NIK KO mice. **(J)** Verification immunoblot of MG132 (10 $\mu$ M) and TWEAK(10ng/mL) treated 3T3-L1 cells with CRISPR-Cas9 modifications for knockout of NIK or RelB, and rescue of human NIK in the NIK KO cell line.

4 Months

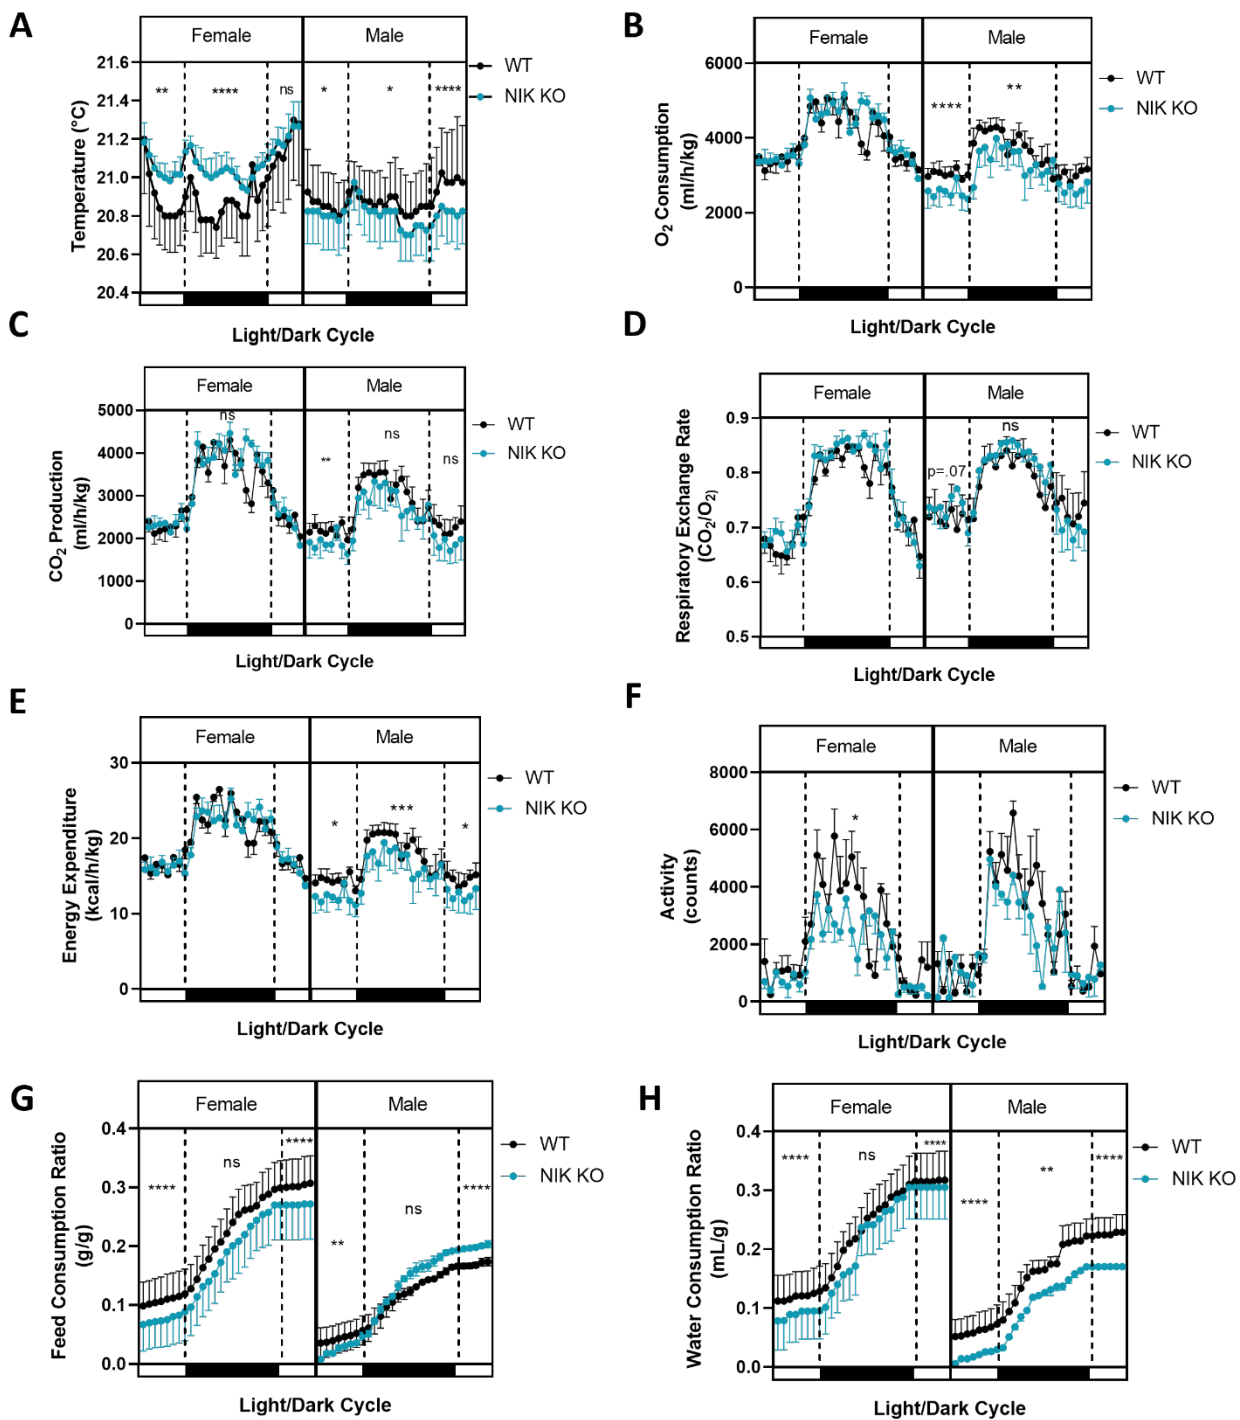

## Supplemental Figure 2.

**(A-H)** Analysis of a 24hr period of metabolic cage data representing chow fed male and female, WT and NIK KO mice **(A)** Metabolic cage temperature of chow fed female and male WT and NIK KO mice at 4 months of age. **(B-H)** Metabolic cage data from 2-month-old *Map3k14* mice. Data are represented as mean  $\pm$  SEM, Males; WT= 5 KO=3, Females; WT=6, KO= 5, \* $p \leq .05$ , \*\* $p \leq .01$ , \*\*\* $p \leq .001$ , \*\*\*\* $p \leq .0001$ , Unpaired Student t-test.

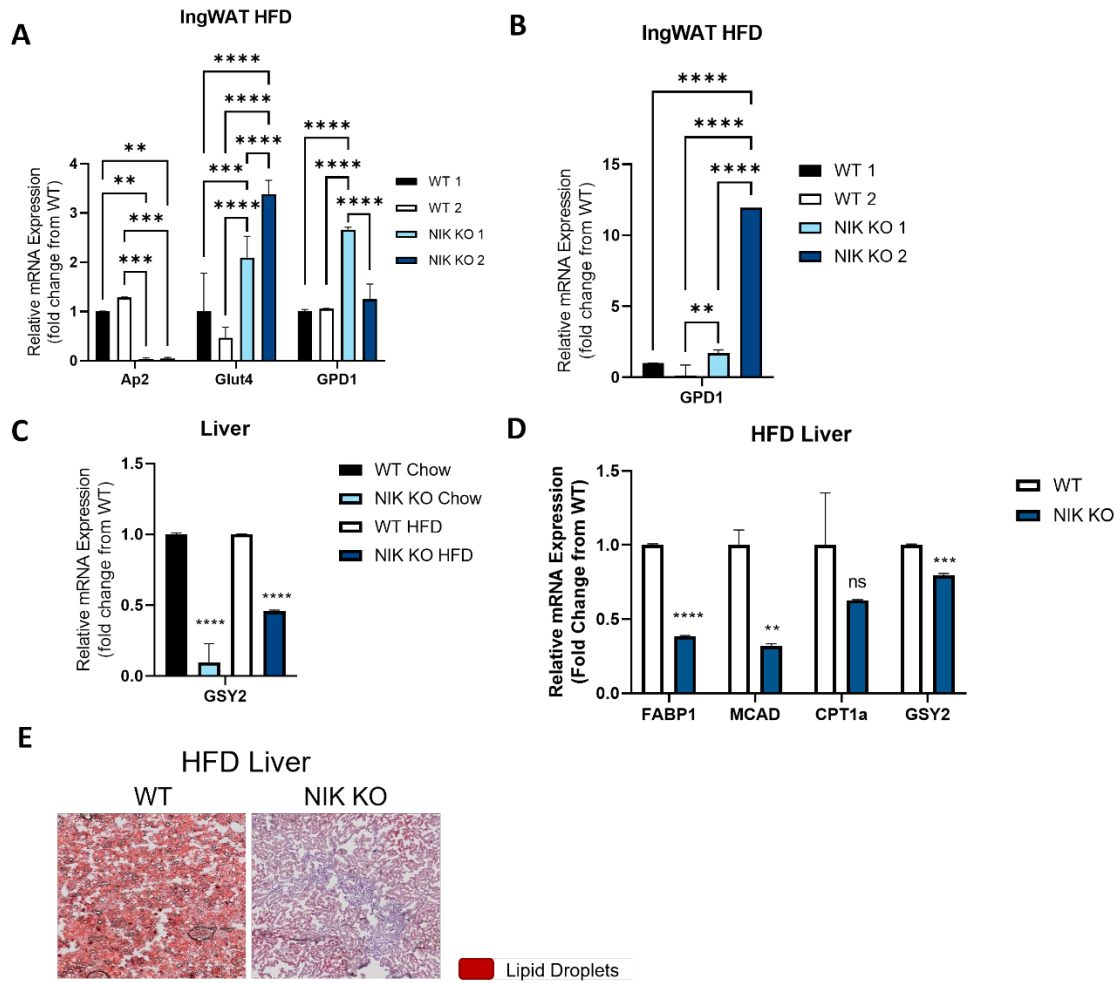

### Supplemental Figure 3.

**(A)** qPCR analysis of adipocyte genes Ap2 (adipocyte specific protein 2; FABP4), GLUT4 (glucose transporter 4, SLC2A4), GPD1 (glucose-3-phosphate dehydrogenase 1) of inguinal WAT from male HFD mice. **(B)** GPD1 mRNA analysis of inguinal WAT from HFD female mice. **(C)** GSY2 (glycogen synthase 2) relative mRNA expression from chow and HFD liver samples. **(D)** qPCR analysis of fatty acid oxidation genes (FAB1; fatty acid binding protein, MCAD; medium chain acyl-CoA dehydrogenase, CPT1 $\alpha$ ; carnitine protein transferase) and glycogen synthase 2 from HFD female liver samples. N=2 biological replicates ran in triplicate **(A-D)** Data represented as mean  $\pm$  SD, Unpaired Student t-test. **(E)** Oil Red O and hematoxylin staining for lipid accumulation in liver samples of HFD mice.

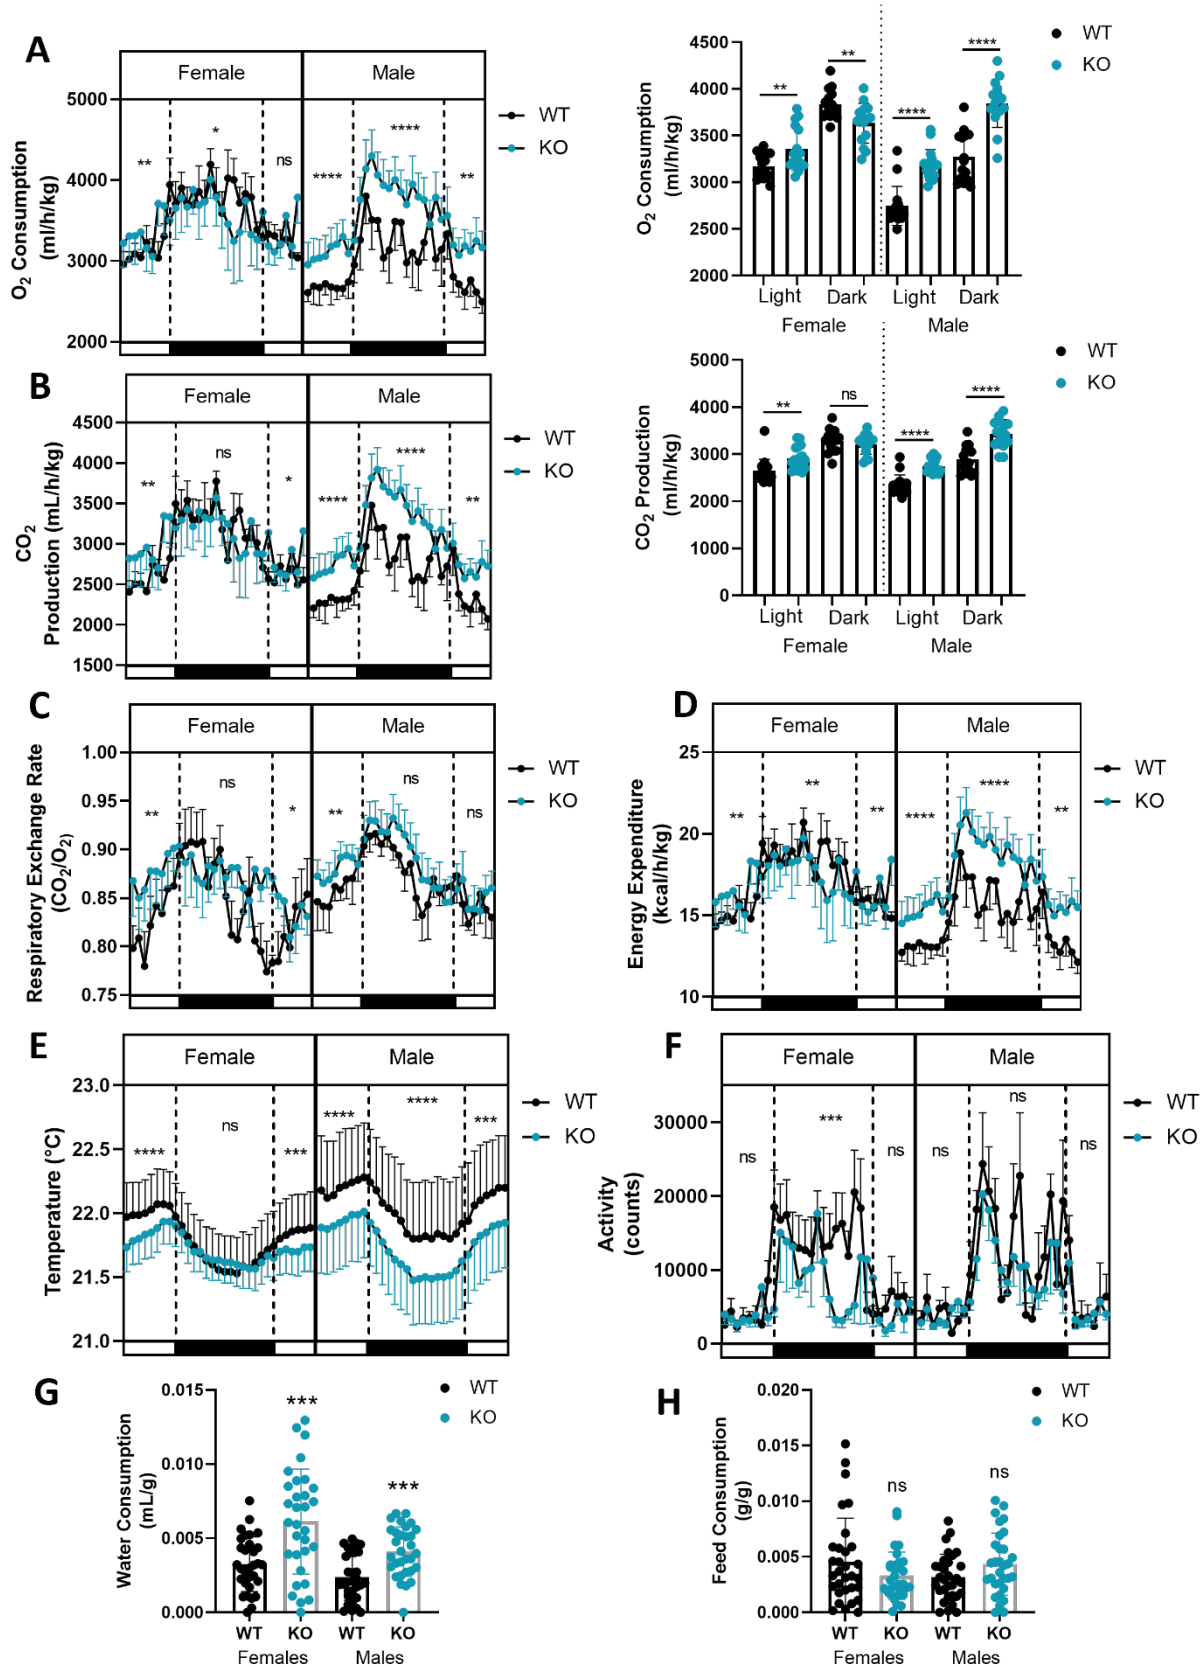

#### **Supplemental Figure 4.**

**(A-H)** Data collected from HFD male and female *Map3k14* mice individually housed in metabolic cages at about 3 months of age. Morning and night analysis from a 24-hour time period of **(A)** oxygen consumption, **(B)** CO<sub>2</sub> production, **(C)** respiratory exchange rate (CO<sub>2</sub>/ O<sub>2</sub>), and **(D)** caloric energy expenditure, **(E)** metabolic cage temperature, **(F)** activity, **(G)** water consumption normalized to body weight, and **(H)** food consumption normalized to body weight. Line graphs represented as mean ± SEM, bar graphs represented as mean ± SD. Males; WT= 5 KO=8, Females; WT=7 KO=6. Data analyzed by Unpaired Student t-test.

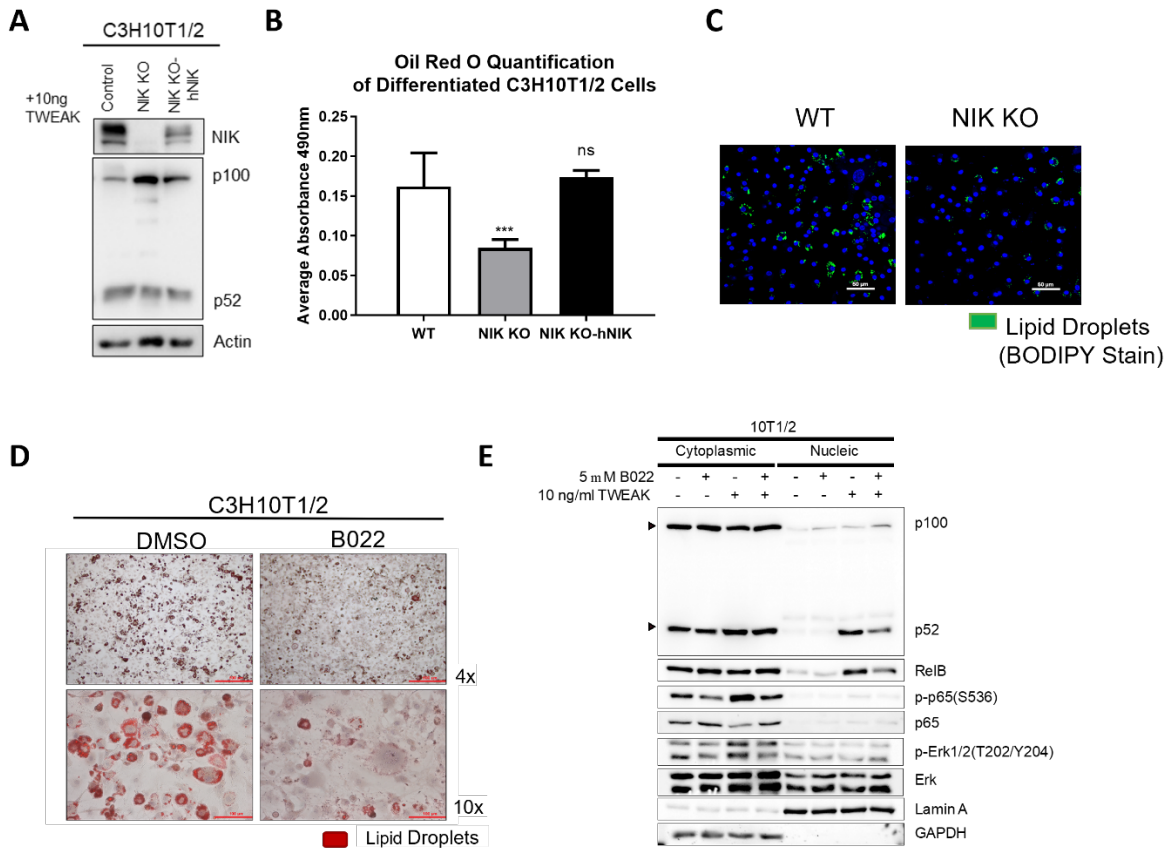

### Supplemental Figure 5.

**(A)** Blot of C3H10T1/2 cells confirming the loss of NIK (NIK KO) and the rescue of non-canonical NF- $\kappa$ B functionality (p100-p52 processing) with the reestablishment of human NIK (NIK KO-hNIK). **(B)** Quantification of oil red o staining of differentiated C3H10T1/2 cells. Data represented as mean  $\pm$  SD, \*  $p \leq .05$ , \*\*  $p \leq .01$ , \*\*\*  $p \leq .001$ , \*\*\*\*  $p \leq .0001$ , Tukey's Multiple Comparison Test. **(C)** Adipocyte differentiation of primary bone marrow cells from WT and NIK KO mice stained with BODIPY (lipid droplets; green) and Hoechst (blue). **(D)** C3H10T1/2 cells treated with DMSO or the NIK inhibitor (B022), induced for adipocyte differentiation, and then stained with Oil Red O. **(E)** Cytoplasmic/ nuclear fractionation of C3H10T1/2 cells treated with B022 (NIK inhibitor) or TWEAK (activator of the noncanonical NF- $\kappa$ B pathway), showing inhibition of p100-p52 processing (induction of noncanonical protein processing by NIK) with B022 treatment.



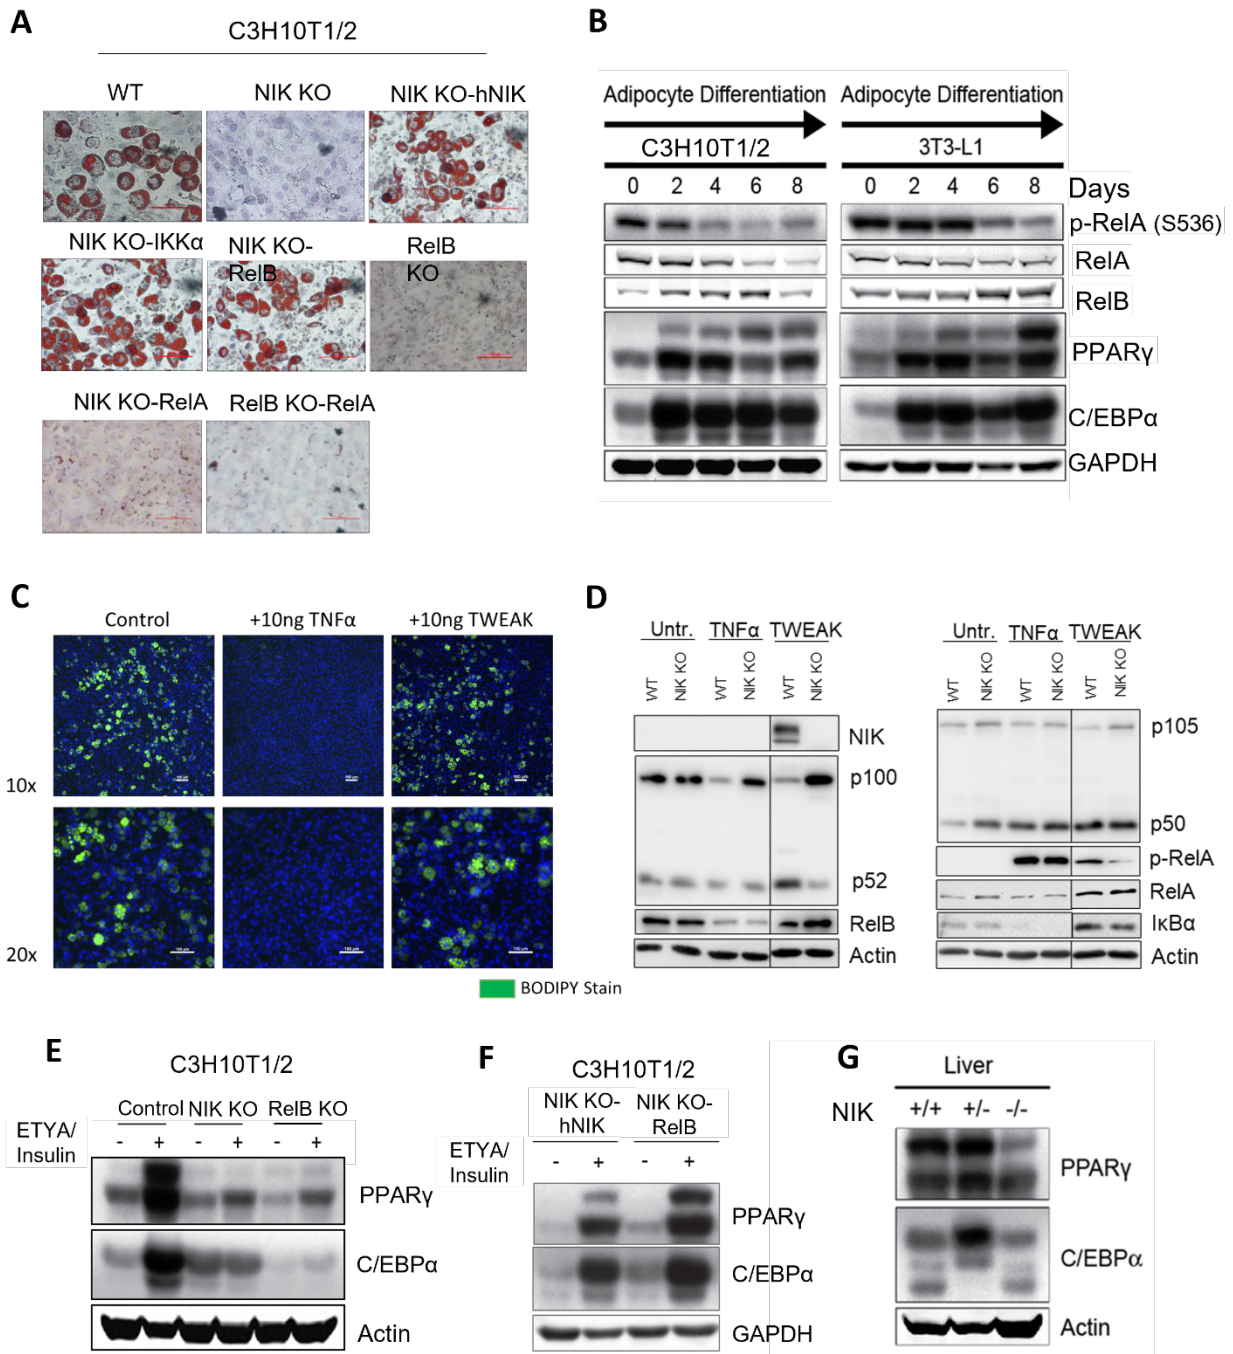

**Supplemental Figure 6.**

**(A)** Oil Red O staining of C3H10T1/2 cells after induction of adipocyte differentiation with ETYA and insulin. **(B)** Immunoblot of adipocyte induction in C3H10T1/2 and 3T3-L1 cells with ETYA/Insulin. **(C)** BODIPY staining of lipid droplets (green) and Hoechst staining (blue) in

differentiated C3H10T1/2 treated with TNF $\alpha$  (tumor necrosis factor alpha; activator of canonical NF- $\kappa$ B pathway) or TWEAK (tumor necrosis weak life factor; activator of noncanonical NF- $\kappa$ B pathway). **(D)** Immunoblots confirming activation of the noncanonical or canonical NF- $\kappa$ B pathway after induction with TWEAK or TNF $\alpha$ , respectively. Immunoblot of transcriptional activators of adipogenesis, PPAR $\gamma$  and C/EBP $\alpha$  expression in undifferentiated and differentiated **(E)** NIK KO, RelB KO, **(F)** NIK KO-hNIK and NIK KO-RelB C3H10T1/2 cells, **(G)** and mouse liver samples.

| Target Gene | Guide RNA Sequence            |
|-------------|-------------------------------|
| NIK         | gNIK-1: AGGAUGGGGCAUCCGCUGU   |
|             | gNIK-2: UACCUUGGUGCAUGCUCUCCA |
|             | gNIK-3: AGUAUCGAGAAGAGGUCCAC  |
|             |                               |
| RelB        | g RelB-1: AGCGGCCUCGCACUCGUAG |
|             | gRelB-2: GCGCUUCCGCUACGAGUGCG |
|             | gRelB-3: ACUGCACGGACGGCGUCUGC |
|             |                               |

**Supplemental Table 1:**

Guide RNA sequences used for CRISPR-Cas9 knockout of NIK or RelB in cell culture.

| Target Gene                    | Forward Sequence                      | Reverse Sequence                   |
|--------------------------------|---------------------------------------|------------------------------------|
| <i>AIPOQ</i><br>(Adiponectin)  | 5'- GTT GCA AGC TCT CCT GTT CC -3'    | 5'- GAG CGA TAC ACA TAA GCG GC -3' |
| <i>AP2</i>                     | 5'- GTG CTG CAG CCT TTC TCA C-3'      | 5'- GTT CCC ACA AAG GCA TCA C-3'   |
| <i>CPT1<math>\alpha</math></i> | 5'-CTG ATG ACG GCT ATG GTG TTT-3'     | 5'-GTG AGG CCA AAC AAG GTG ATA-3'  |
| <i>FABP1</i>                   | 5'- CCA ATT GCA GAG CCA GGA GA-3'     | 5'- CCC CTT GAT GTC CTT CCC TTT-3' |
| <i>GPD1</i>                    | 5'- ACA CCC AAC TTT CGC ATC AC -3'    | 5'- TAG CAG GTC GTG ATG AGG TC -3' |
| <i>GSY2</i>                    | 5'- CAC ATC ACC ACC AAC GAC GGA-3'    | 5'- TTT AGC CGA TCC CTC TCA GCC-3' |
| <i>LEP</i><br>(Leptin)         | 5'- TTC CTG GTG GCT TTG GTC CTA -3'   | 5'- AGC ACA TTT TGG GAA GGC AG -3' |
| <i>MCAD</i>                    | 5'-ACC CTG TGG AGA AGC TGA TG-3'      | 5'-AGC AAC AGT GCT TGG AGC TT-3'   |
| <i>SLC2a4</i><br>(GLUT4)       | 5'- GAA ACC CAT GCC GAC AAT GA -3'    | 5'- CTG TGC CAT CTT GAT GAC CG -3' |
| <i>GAPDH</i>                   | 5'- CTT TGT CAA GCT CAT TTC CTG G -3' | 5'- TCT TGC TCA GTG TCC TTG C -3'  |
| <i>RPLP0</i>                   | 5'-AAG CGC GTC CTG GCA TTG TCT-3'     | 5'-CCG CAG GGG CAG CAG TGG T- 3'   |

**Supplemental Table 2:**

Primers used for qPCR analysis of cells or tissue. 3T3-L1 gene expression was normalized to GAPDH. Mouse tissue gene expression was normalized to RPLP0.
